# Supplementary material
Source: PubMed Central journal article supplement (PMC524730)
Supplement: mbc_E04-02-0108_2.pdf [file mbc_E04-02-0108_2.pdf]

# Shim et al. Supplemental Figure 2

## RT-PCR from N2 and transgenic worms

### *xbp-1* gene structure

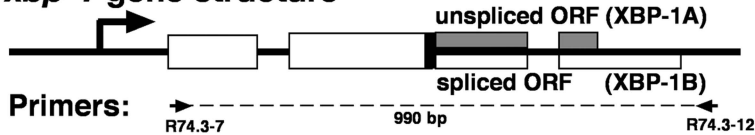

### XB3

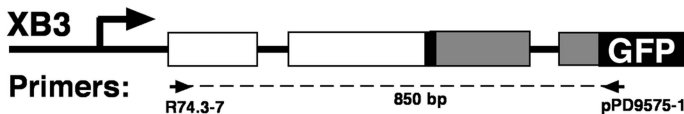

### XB7

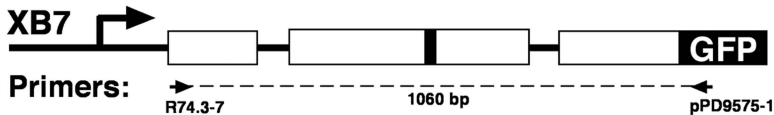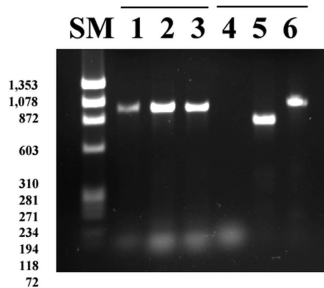

SM:  $\phi$ X174 HaellI marker(NEB)

1,2,3: R74.3-7 and R74.3-12

4,5,6: R74.3-7 and pPD9575-1(GFP)

1. Wild Type (no transgene) RNA
2. XB3 RNA
3. XB7 RNA
4. Wild Type (no transgene) RNA
5. XB3 RNA
6. XB7 RNA
