# Supplementary material
Source: PubMed Central journal article supplement (PMC524730)

# Shim et al. Supplemental Figure 3

## PCR from 48 subclones of transgenic worms

pXB3 transgene mRNA (850bp)

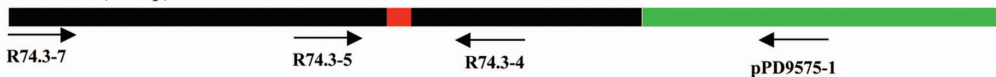

pXB7 transgene mRNA (1060bp)

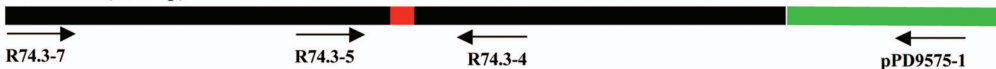

160bp

or

147bp

■ 23 bp regulatory intron

PCR with R74.3-5 and R74.3-4 primers (2.5% agarose gel)

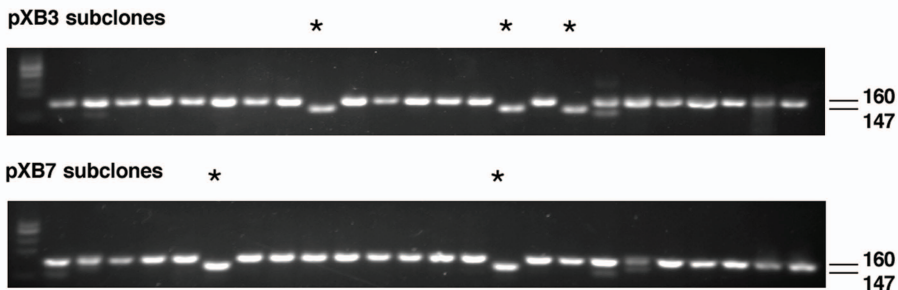

Supplement: mbc_E04-02-0108_3.pdf [file mbc_E04-02-0108_3.pdf]
