# Supplementary material
Source: PubMed Central journal article supplement (PMC524730)
Supplement: mbc_E04-02-0108_4.pdf [file mbc_E04-02-0108_4.pdf]

# Shim et al. Supplemental Figure 4

## Sequence of *xbp-1* genomic DNA and cDNA

|                          |                                                                                     |     |
|--------------------------|-------------------------------------------------------------------------------------|-----|
| genomic                  | ATGGCTCCCAAGCGTGCACCTTCCAACAGAACAAAGTTGTCGCACAACCTTCTTGGCGATGATATGGGACCATCTGGGCCACG | 80  |
| cDNA                     | ATGGCTCCCAAGCGTGCACCTTCCAACAGAACAAAGTTGTCGCACAACCTTCTTGGCGATGATATGGGACCATCTGGGCCACG | 80  |
| genomic                  | CAAAAGAGAACGACTGAATCATTGAGTCAGGAGGAGAAAATGGATCGTCGAAACTTAAAAATCGAGTCGCAGCCCCAAA     | 160 |
| cDNA                     | CAAAAGAGAACGCTGTAATCATTGAGTCAGGAGGAGAAAATGGATCGTCGAAACTTAAAAATCGAGTCGCAGCCCCAAA     | 160 |
| <b>Intron 1</b>          |                                                                                     |     |
| genomic                  | ATGCTAGAGACAAAAAGAAGGTTAGTGTGAATGTTTATCGAACCCCTGAAAATAAGTTTAAATCTTGTAGAAAAGATCAG    | 240 |
| cDNA                     | ATGCTAGAGACAAAAAGAAG-----GAAAGATCAG                                                 | 190 |
| genomic                  | CAAAGATCGAGGATGTGATGCGCGATCTGGTGGAGGAGAACCGCCGGCTCCGCGCTGAAAACGAACGCTTCCGCGTCAA     | 320 |
| cDNA                     | CAAAGATCGAGGATGTGATGCGCGATCTGGTGGAGGAGAACCGCCGGCTCCGCGCTGAAAACGAACGCTTCCGCGTCAA     | 270 |
| genomic                  | AATAAAAACTTTATGAACCAGCAGAACGAGTCCGTCATGTATATGGAAGAGAACAACGAAAACCTTGATGAACAGCAATGA   | 400 |
| cDNA                     | AATAAAAACTTTATGAACCAGCAGAACGAGTCCGTCATGTATATGGAAGAGAACAACGAAAACCTTGATGAACAGCAATGA   | 350 |
| genomic                  | TGCATGCATCTACCAGAACGTCGCTACGAAGAAGAAGTCGTCGGTGAGGTTGCACCAGTTGTCGTCGTCGGAGGAGAGG     | 480 |
| cDNA                     | TGCATGCATCTACCAGAACGTCGCTACGAAGAAGAAGTCGTCGGTGAGGTTGCACCAGTTGTCGTCGTCGGAGGAGAGG     | 430 |
| <b>Regulatory Intron</b> |                                                                                     |     |
| genomic                  | ATCGCCGTGCCTTTGAATCAGCAGCATTCAATTAATGAGCCTCAGCAGTGGGAACAGGCCCGATCCACCTCCATCAACAAC   | 560 |
| cDNA                     | ATCGCCGTGCCTTTGAATCAG-----CAGTGGGAACAGGCCCGATCCACCTCCATCAACAAC                      | 490 |
| genomic                  | AACATCAGCAACCAACTCCGTCGTATGGATTCCAAGAAGAACACACAATCAGTGTGGATATGTATCTAACTATCATCTC     | 640 |
| cDNA                     | AACATCAGCAACCAACTCCGTCGTATGGATTCCAAGAAGAACACACAATCAGTGTGGATATGTATCTAACTATCATCTC     | 570 |
| genomic                  | GATTCTATGCAACCACATGGATCGCAACAAGAAGATGGACACCTCGAACAAATCCTCGAACATCTCAAGGTAAGATAATT    | 720 |
| cDNA                     | GATTCTATGCAACCACATGGATCGCAACAAGAAGATGGACACCTCGAACAAATCCTCGAACATCTCAAG-----          | 639 |
| <b>Intron 2</b>          |                                                                                     |     |
| genomic                  | AGAAACTTCCTAATGTTTATGTATTAACCTCATAAAATTTCCAGAGCCCAAGCGGAGAGTTCGATCGATTCTGCTGGCT     | 800 |
| cDNA                     | -----AGCCCAAGCGGAGAGTTCGATCGATTCTGCTGGCT                                            | 676 |
| genomic                  | ACATTGAGGAAGGAGCAGACGGTTATGACGCGTCTTGTTCAGCGGATCCATGTACACATCTTCAGAAACCGGTGAAACA     | 880 |
| cDNA                     | ACATTGAGGAAGGAGCAGACGGTTATGACGCGTCTTGTTCAGCGGATCCATGTACACATCTTCAGAAACCGGTGAAACA     | 756 |
| genomic                  | CTTTCGCCGAATCCCTAG                                                                  | 899 |
| cDNA                     | CTTTCGCCGAATCCCTAG                                                                  | 775 |
