# Supplementary material
Source: PubMed Central journal article supplement (PMC524730)

# Shim et al. Supplemental Figure 1

## Competitive RT-PCR from L1 and Young Adult RNA

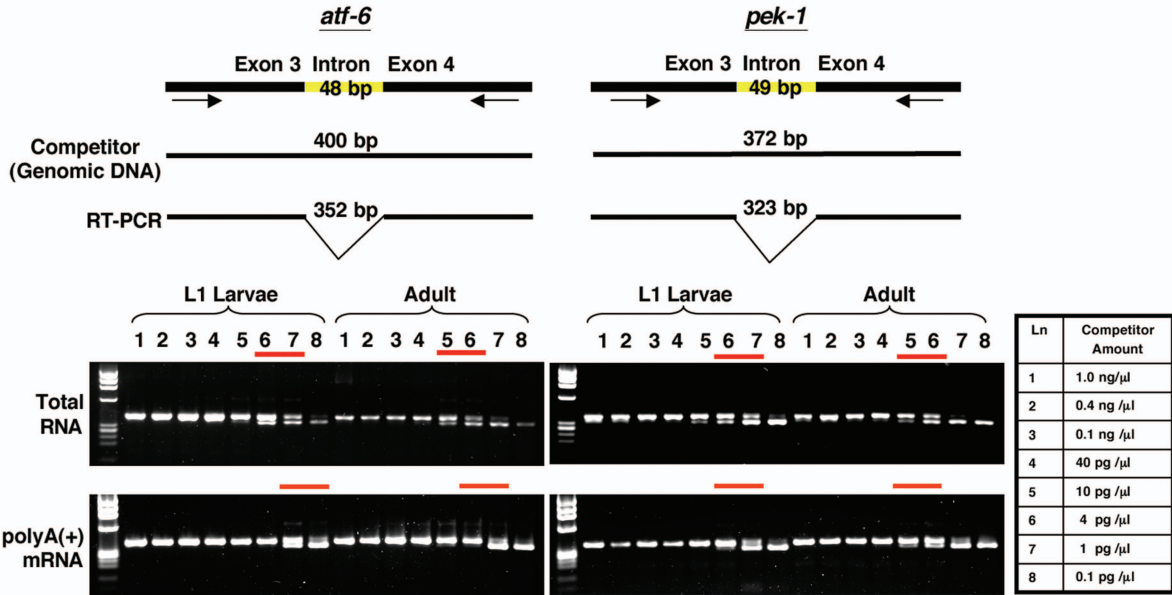

Supplement: mbc_E04-02-0108_1.pdf [file mbc_E04-02-0108_1.pdf]
